RESEARCH ARTICLE

# Effects of Iron Overload on the Activity of Na, K-ATPase and Lipid Profile of the Human Erythrocyte Membrane

Leilismara Sousa<sup>1</sup>, Israel J. P. Garcia<sup>1</sup>, Tamara G. F. Costa<sup>1</sup>, Lilian N. D. Silva<sup>1</sup>, Cristiane O. Renó<sup>1</sup>, Eneida S. Oliveira<sup>3</sup>, Cristiane Q. Tilelli<sup>2</sup>, Luciana L. Santos<sup>3</sup>, Vanessa F. Cortes<sup>1</sup>, Herica L. Santos<sup>1</sup>, Leandro A. Barbosa<sup>1\*</sup>

**1** Laboratório de Bioquímica Celular, Universidade Federal de São João del Rei, Campus Centro-Oeste Dona Lindú, Av Sebastião Gonçalves Coelho 400, 35501–296, Divinópolis, Brazil, **2** Laboratório de Estudos em Neurociências das Epilepsias e Comorbidades, Universidade Federal de São João del Rei, Campus Centro-Oeste Dona Lindú, Av Sebastião Gonçalves Coelho 400, 35501–296, Divinópolis, Brazil, **3** Laboratório de Biologia Molecular, Universidade Federal de São João del Rei, Campus Centro-Oeste Dona Lindú, Av Sebastião Gonçalves Coelho 400, 35501–296, Divinópolis, Brazil

\* [leaugust@yahoo.com.br](mailto:leaugust@yahoo.com.br)

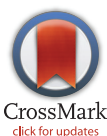

**OPEN ACCESS**

**Citation:** Sousa L, Garcia IJP, Costa TGF, Silva LND, Renó CO, Oliveira ES, et al. (2015) Effects of Iron Overload on the Activity of Na,K-ATPase and Lipid Profile of the Human Erythrocyte Membrane. PLoS ONE 10(7): e0132852. doi:10.1371/journal.pone.0132852

**Editor:** Fanis Missirlis, CINVESTAV-IPN, MEXICO

**Received:** February 4, 2015

**Accepted:** June 19, 2015

**Published:** July 21, 2015

**Copyright:** © 2015 Sousa et al. This is an open access article distributed under the terms of the [Creative Commons Attribution License](https://creativecommons.org/licenses/by/4.0/), which permits unrestricted use, distribution, and reproduction in any medium, provided the original author and source are credited.

**Data Availability Statement:** All relevant data are within the paper.

**Funding:** This work was supported by FAPEMIG (Fundação de Amparo a Pesquisa do Estado de Minas Gerais), CAPES (Coordenação de Aperfeiçoamento de Pessoal de Nível Superior) and CNPq (Conselho Nacional de Desenvolvimento Científico e Tecnológico).

**Competing Interests:** The authors have declared that no competing interests exist.

## Abstract

Iron is an essential chemical element for human life. However, in some pathological conditions, such as hereditary hemochromatosis type 1 (HH1), iron overload induces the production of reactive oxygen species that may lead to lipid peroxidation and a change in the plasma-membrane lipid profile. In this study, we investigated whether iron overload interferes with the Na,K-ATPase activity of the plasma membrane by studying erythrocytes that were obtained from the whole blood of patients suffering from iron overload. Additionally, we treated erythrocytes of normal subjects with 0.8 mM H<sub>2</sub>O<sub>2</sub> and 1 μM FeCl<sub>3</sub> for 24 h. We then analyzed the lipid profile, lipid peroxidation and Na,K-ATPase activity of plasma membranes derived from these cells. Iron overload was more frequent in men (87.5%) than in women and was associated with an increase (446%) in lipid peroxidation, as indicated by the amount of the thiobarbituric acid reactive substances (TBARS) and an increase (327%) in the Na,K-ATPase activity in the plasma membrane of erythrocytes. Erythrocytes treated with 1 μM FeCl<sub>3</sub> for 24 h showed an increase (132%) in the Na,K-ATPase activity but no change in the TBARS levels. Iron treatment also decreased the cholesterol and phospholipid content of the erythrocyte membranes and similar decreases were observed in iron overload patients. In contrast, erythrocytes treated with 0.8 mM H<sub>2</sub>O<sub>2</sub> for 24 h showed no change in the measured parameters. These results indicate that erythrocytes from patients with iron overload exhibit higher Na,K-ATPase activity compared with normal subjects and that this effect is specifically associated with altered iron levels.

## Introduction

Iron is an essential chemical element for human life because it participates in fundamental physiological processes, such as oxygen transport, mitochondrial respiration, DNA synthesis, oxidative energy production and the inactivation of free radicals. The average amount of serum iron in the normal adult body varies from 65–176  $\mu\text{g/dL}$  [1–2], with feeding [3] and erythrocyte senescence [1, 4] representing the major sources.

Various enzymes and cell types are involved in iron metabolism, including enterocytes, erythrocytes, macrophages and hepatocytes [1]. Changes in protein expression can severely impact iron homeostasis; for example, decreased synthesis of the hormone hepcidin, an inhibitor of the iron transport protein ferroportin, can lead to a progressive and pathological accumulation of iron in the body [5], especially in parenchymal organs [6]. An accurate diagnosis requires the detection of increases in the main biochemical markers of iron overload, i.e., serum ferritin and the transferrin saturation index; the appearance of clinical manifestations should be noted, and mutations should be identified by genetic testing [7]. Iron overload is known to cause cellular damage because of its multiple important functions, such as the mediation of lipid peroxidation caused by reactive oxygen species (ROS) [6]. Additionally, lipoperoxidation changes the lipid composition, fluidity and permeability of the plasma membrane, which may in turn affect the function of resident enzymes such as the Na,K-ATPase [8–9].

Ionic transport is essential for the maintenance of viable erythrocytes in blood. Several pathways mediate the water and solute balance in erythrocytes, and cellular volume is regulated by the monovalent cation concentration [10]. The transport of anions and cations through the membrane is regulated by several enzymes, including the  $\text{Ca}^{2+}$ -ATPase,  $\text{Na}^{1+}/\text{Ca}^{2+}$  exchanger, Na-K-Cl cotransporter (NKCC), band-3 protein, H-ATPase and Na,K-ATPase [11–14]. Na,K-ATPase is a key protein that regulates the cellular volume of erythrocytes, which is fundamental for avoiding hemolysis, and has a huge impact on the deformability of erythrocytes, which is necessary to withstand blood pressure and pass through narrow vessels; thus, it is a crucial factor for erythrocyte viability [15]. Moreover, Na,K-ATPase activation increases glycolysis in erythrocytes [16–17].

Na,K-ATPase is a dimeric integral membrane enzyme that belongs to the class of P-type ATPases. Na,K-ATPase catalyzes the transport of 3 sodium ions outside the cells and 2 potassium ions into the cells, thereby generating an asymmetric gradient across the plasma membrane [18]. This gradient is important for the transport of glucose and amino acids through the membrane and for maintaining the cell resting potential [19]. The Na,K-ATPase exists as several isoenzymes, which result from the variable combinations of molecular forms of the  $\alpha$  and  $\beta$  subunits. A  $\gamma$  subunit is also encoded by the FXD2 gene and forms part of the Na,K-ATPase in some tissues [20–21]. The  $\alpha$  subunit contains the catalytic domain and has a molecular weight between 110 and 112 kDa, 10 transmembrane segments and a small ectodomain. The  $\alpha$  subunit contains binding sites for sodium and potassium ions, ATP and cardiotonic steroids such as ouabain, which is an inhibitor of the enzyme [22]. The  $\beta$  subunit is a glycoprotein with a molecular weight between 40 and 60 kDa. The  $\beta$  subunit contains a regulatory domain in its transmembrane helix, which contains a glycosylation site that is essential for the normal activity of the enzyme [23]. The  $\gamma$  subunit has a single transmembrane domain, an approximate molecular weight of 7 kDa, and a hydrophobic character that facilitates its role in the modulation of Na,K-ATPase activity [24–25]. These subunits may also appear as different isoforms. The subunit isoforms that are found in erythrocytes are  $\alpha 1$ ,  $\alpha 3$ ,  $\beta 1$ ,  $\beta 2$ ,  $\beta 3$  and  $\gamma$  [26].

The activity of Na,K-ATPase is modulated by the intracellular and extracellular ATP and sodium concentrations. The affinity of Na,K-ATPase for sodium and potassium seems to be modulated by tissue-specific factors, such as the lipid composition of the membrane [20, 27–

[28]. It has been shown that the activity of Na,K-ATPase is elevated in renal epithelial cells of Madin-Darby canines (MDCK), which leads to an increase in iron transport and low concentrations of potassium [29]. Because Na,K-ATPase is important in the regulation of several properties in erythrocytes, it has been hypothesized that this enzyme may be used as a marker for characterizing the cell-damage status due to iron overload.

In the current work, we report the biochemical investigations of the effects of iron overload on Na,K-ATPase activity and lipid peroxidation in human erythrocytes.

## Materials and Methods

### 2.1. Patients

Blood samples were obtained from patients experiencing iron overload with ferritin values greater than 200 µg for women and 300 µg for men. Patients with metabolic syndrome, alcohol utilization, chronic inflammation or hepatic disease were excluded from this study. In this context, the patients who were included could be classified as having hemochromatosis according to the American Hemochromatosis Guidelines; however, in Brazil, these patients do not have a confirmed genetic diagnosis due to a lack of financial resources.

The patients in this study were under standard care, which includes therapeutic phlebotomy due to high iron and ferritin concentrations. The samples were collected at the outpatient clinic of the Hemonúcleo Regional Divinópolis / MG, Brazil, an outpatient unit that belongs to the Hemominas Foundation and is used for conducting therapeutic phlebotomy. Blood samples from whole blood bags with CPDA-1 (Citrate Phosphate Dextrose Adenine-1) and a tube with EDTA (ethylenediamine tetraacetic acid) were collected from patients treated between September and December 2012. As a control group, we selected healthy volunteers with ferritin values lower than 200 µg for women and 300 µg for men and with similar ages to the patients and no clinical symptoms of iron overload. The information about clinical manifestations was collected through a questionnaire answered by the patients.

This study was approved by the Hemominas Foundation Research Ethics Committee and by the Ethics in Research involving Human Subjects of the Universidade Federal de São João del Rei, Campus Centro-Oeste Dona Lindu—CEPES / CCO, with the number 138.241. All of the procedures followed in this study were in accordance with the ethical standards of the responsible committees on human experimentation (institutional and national) and with the Helsinki Declaration of 1975. All patients were informed about the study and consented to participate by signing an Informed Consent Form.

### 2.2. Genetic analysis

Genomic DNA of patients was extracted from peripheral blood leukocytes and quantified with NanoDrop 2000c spectrophotometer, Thermo Scientific. The Polymerase Chain Reaction (PCR) was performed to amplify regions of exons 2 and 4 of the gene that codifies for the human hemochromatosis protein (HFE). Exon 2 was amplified with the forward primer (E2F, ACATGGTTAA GGCTGTTGC 5'–3') and the reverse primer E2R (GCCACATCTGGCTTGAAATT 5'–3'), and exon 4 with the forward primer E4F (TGCCCTCCTTTGGTGAAGGTGAC 5'–3') and the reverse primer E4R (CTCAGGCACTCCTCTCAACC 5'–3'). All primers were manufactured by Eurofins MWG Operon. PCR products of exon 2 were digested with the restriction enzymes Bcl I (Jena Bioscience, Jena, Germany), and Hinf I (Fermentas, Vilnius, Lithuania), to detect mutations H63D and S65C, respectively. PCR products of exon 4 were digested with the restriction enzyme Afa I (Invitrogen, Carlsbad, CA, USA). PCR products were analyzed by electrophoresis in non-denaturing 8% polyacrylamide gel stained with ethidium bromide.

### 2.3. Preparation of erythrocyte membranes

Preparations of cytoplasm-free membrane ghosts were done according to Rega et al. [30] with some modifications. The blood concentrates were spun at 6,500×g for 10 min at 4°C. The precipitates were dissolved in a solution of 20 mM Tris-HCl (pH 7.4), 130 mM KCl, and 0.6 mg/ml phenylmethylsulfonyl fluoride (PMSF). This suspension was spun at 6,500×g for 10 min at 4°C. The cells were submitted to lysis by freezing in liquid nitrogen followed by thawing at room temperature (25°C). The lysates were then mixed with 5 mM 4-2-hydroxyethyl-1-piperazineethanesulfonic acid (HEPES; pH 7.4), 1 mM ethylenediamine tetraacetic acid (EDTA) and 0.6 mg/ml PMSF and spun again at 9,000×g for 10 min at 4°C. This centrifugation step was repeated four times, and the resulting pellet was dissolved in 10 mM HEPES (pH 7.4), 130 mM KCl, 0.5 mM MgCl<sub>2</sub>, and 0.05 mM CaCl<sub>2</sub>, and finally spun at 9,000×g for 10 min, mixed with a small volume of this last buffer, and stored in nitrogen until use.

### 2.4. Determination of oxidized iron (Fe<sup>3+</sup>) in plasma samples

The iron ion concentration was estimated from the absorbance of the colored complex formed by reaction with KSCN Fe<sup>3+</sup> [31]. The absorbance was read at 480 nm and the calibration curve was first established with a 1 mmol / L FeCl<sub>3</sub> solution.

### 2.5. Determination of thiobarbituric acid reactive substances (TBARS)

The measurement of TBARS was conducted using the methodology described by Buege and Aust [32], with ghost membrane samples obtained as described above.

### 2.6. Determination of Na,K-ATPase activity

The Na,K-ATPase activity was determined at 37°C, by measuring the inorganic phosphate released in the reaction containing HEPES buffer (50 mM HEPES, pH 7.5, 20 mM KCl, 2 mM MgCl<sub>2</sub>, 120 mM NaCl), ATP 3 mM and ghost membranes (47 mg), in a final volume of 0.25 µl. The experiments were performed in the presence and absence of ouabain, to specifically determine the activity of Na,K-ATPase. The reaction was initiated by the addition of ATP to HEPES buffer and stopped with 100 µl of 1% SDS (w/v) after 60 minutes. The inorganic phosphate produced by the hydrolysis of ATP was determined spectrophotometrically, according to Fiske and Subbarow [33], at 660 nm.

### 2.7. Extraction and quantification of phospholipids and cholesterol in the plasma membrane

The lipid extraction was performed with chloroform:isopropanol (14:11), according to the method of Oaklander and Rose [34] and Vokurková, Nováková et al [35]. After phase separation, the organic layer was dried and re-suspended in a known volume of chloroform. The total phospholipids were measured by quantification of inorganic phosphate released from hydrolysis, according to the procedure described by Chen and Toribara [36], and the total cholesterol was determined according to the method of Higgins [37].

### 2.8. Statistical analysis

Statistical analysis were performed as appropriate, using the following tests: D'Agostino-Pearson and Shapiro-Wilk normality tests, Student's t test and Mann Whitney test to compare means, chi-square test and Fisher exact test to compare proportions, for determination of correlation between data, Pearson and Spearman correlation and ANOVA to determination of variance. The alpha set for the analysis of significance was 5.0% and the software used was GraphPad Prism 5.

**Table 1. Main clinical manifestations reported by patients with hyperferritinemia grouped by age.**

| Clinical manifestations | Less than 50 years  | Older than 50 years    | P *   |
|-------------------------|---------------------|------------------------|-------|
| Chronic liver disease   | 7 (58,3%)           | 4 (33,3%)              | 0,414 |
| Diabetes                | 0 (0%)              | 3 (25%)                | -     |
| Arthropathy             | 5 (41,7%)           | 8 (66,7%)              | 0,414 |
| Fatigue/weakness        | 7 (58,3%)           | 6 (50%)                | 1,000 |
| Skin hyperpigmentation  | 2 (16,7%)           | 9 (75%)                | 0,012 |
| Sudoresis               | 4 (33,3%)           | 3 (25%)                | 1,000 |
| Impotence               | 0 (0%) <sup>†</sup> | 2 (18,2%) <sup>‡</sup> | -     |

\*  $\chi^2$

<sup>†</sup> n = 10

<sup>‡</sup> n = 11

doi:10.1371/journal.pone.0132852.t001

## Results

### 3.1 Clinical manifestations and genetic analysis

This study included 24 patients suffering from iron overload (21 men and 3 women), with a median age of 49 years. Two of the patients were brothers. Fourteen subjects were recruited for the control group, 10 men and 4 women, who had a median age of 45 years. Each patient was treated an average of 6 times, with a range of 1 to 22 phlebotomies and an average prescribed volume of 427 ml of whole blood withdrawal. The clinical manifestations did not show any correlation to the number or frequency of phlebotomies undergone by patients ( $p > 0.05$ ). The main clinical manifestations reported by patients are listed in [Table 1](#) according to age group.

The frequencies of C282Y and H63D mutations were 35.4% and 14.6%, respectively, in the patient group and 17.9% and 3.6%, respectively, for the control group. The HFE genotype frequency is shown in [Table 2](#). Neither case nor control subjects presented the S65C mutation in the HFE gene or were compound heterozygous for C282Y or H63D. The most frequent genotype for case patients was H63D/WT, with a frequency of 45.8% compared with 35.7% for the control group; however, this difference is not statistically significant.

### 3.2. Influence of iron overload on the oxidative state of erythrocytes

The concentration of erythrocytes obtained from the patients ( $0.065 \pm 0.029$ , n = 24) is not significantly different from that of control subjects ( $0.048 \pm 0.014$ , n = 14;  $p = 0.087$ ; [Fig 1A](#)).

**Table 2. Frequency of HFE genotypes in patients and control subjects.**

| HFE genotype          | Patients |                         | Control |                         | P*    |
|-----------------------|----------|-------------------------|---------|-------------------------|-------|
|                       | n        | Genotypic frequency (%) | n       | Genotypic frequency (%) |       |
| C282Y/C282Y           | 3        | 12,5                    | 0       | 0,0                     | -     |
| C282Y/WT <sup>†</sup> | 1        | 4,2                     | 1       | 7,1                     | 1,0   |
| H63D/H63D             | 3        | 12,5                    | 0       | 0,0                     | -     |
| H63D/WT               | 11       | 45,8                    | 5       | 35,7                    | 0,491 |
| No mutation           | 6        | 25,0                    | 8       | 57,2                    | 0,081 |
| Total                 | 24       | 100,0                   | 14      | 100,0                   | -     |

\*  $\chi^2$

<sup>†</sup>WT (wild type)

doi:10.1371/journal.pone.0132852.t002

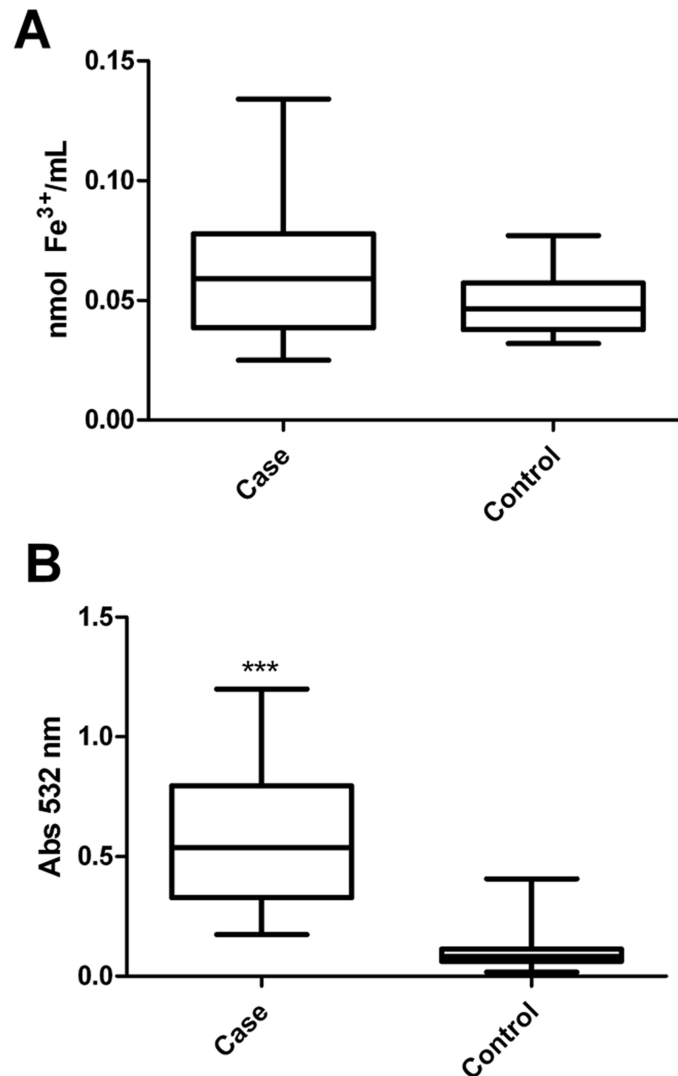

**Fig 1. Iron overload effect on oxidative stress.** (A) Content of Fe<sup>3+</sup> in the residual plasma of individuals with or without iron overload: n = 24 (case) and n = 14 (control), p = 0.087 (Mann Whitney). (B) Lipid peroxidation in subjects with or without iron overload: n = 14 (case) and n = 14 (control), p < 0.0001 (Student's t test). All experiments were performed in triplicate and the line in bars represented the mean and the error bar denotes SEM.

doi:10.1371/journal.pone.0132852.g001

Peroxidated lipids, measured as the amount of TBARS, showed an increase of 446% in erythrocyte membranes from the case group ( $0.442 \pm 0.043$ , n = 24) compared to the control group ( $0.099 \pm 0.014$ , n = 14; p < 0.0001; [Fig 1B](#)).

### 3.3. Iron overload changes the lipid profile of erythrocyte plasma membranes

No existing studies demonstrate whether iron overload changes the lipid profile of erythrocyte plasma membranes. These changes may result from the peroxidation of lipids by reactive oxygen species (ROS) that are produced by iron and would be expected to alter membrane fluidity and the activities of membrane enzymes [8,9,38,39]. The lipid profile of erythrocyte membranes in the patient group differed from that of the control group, as observed in [Fig 2A](#).

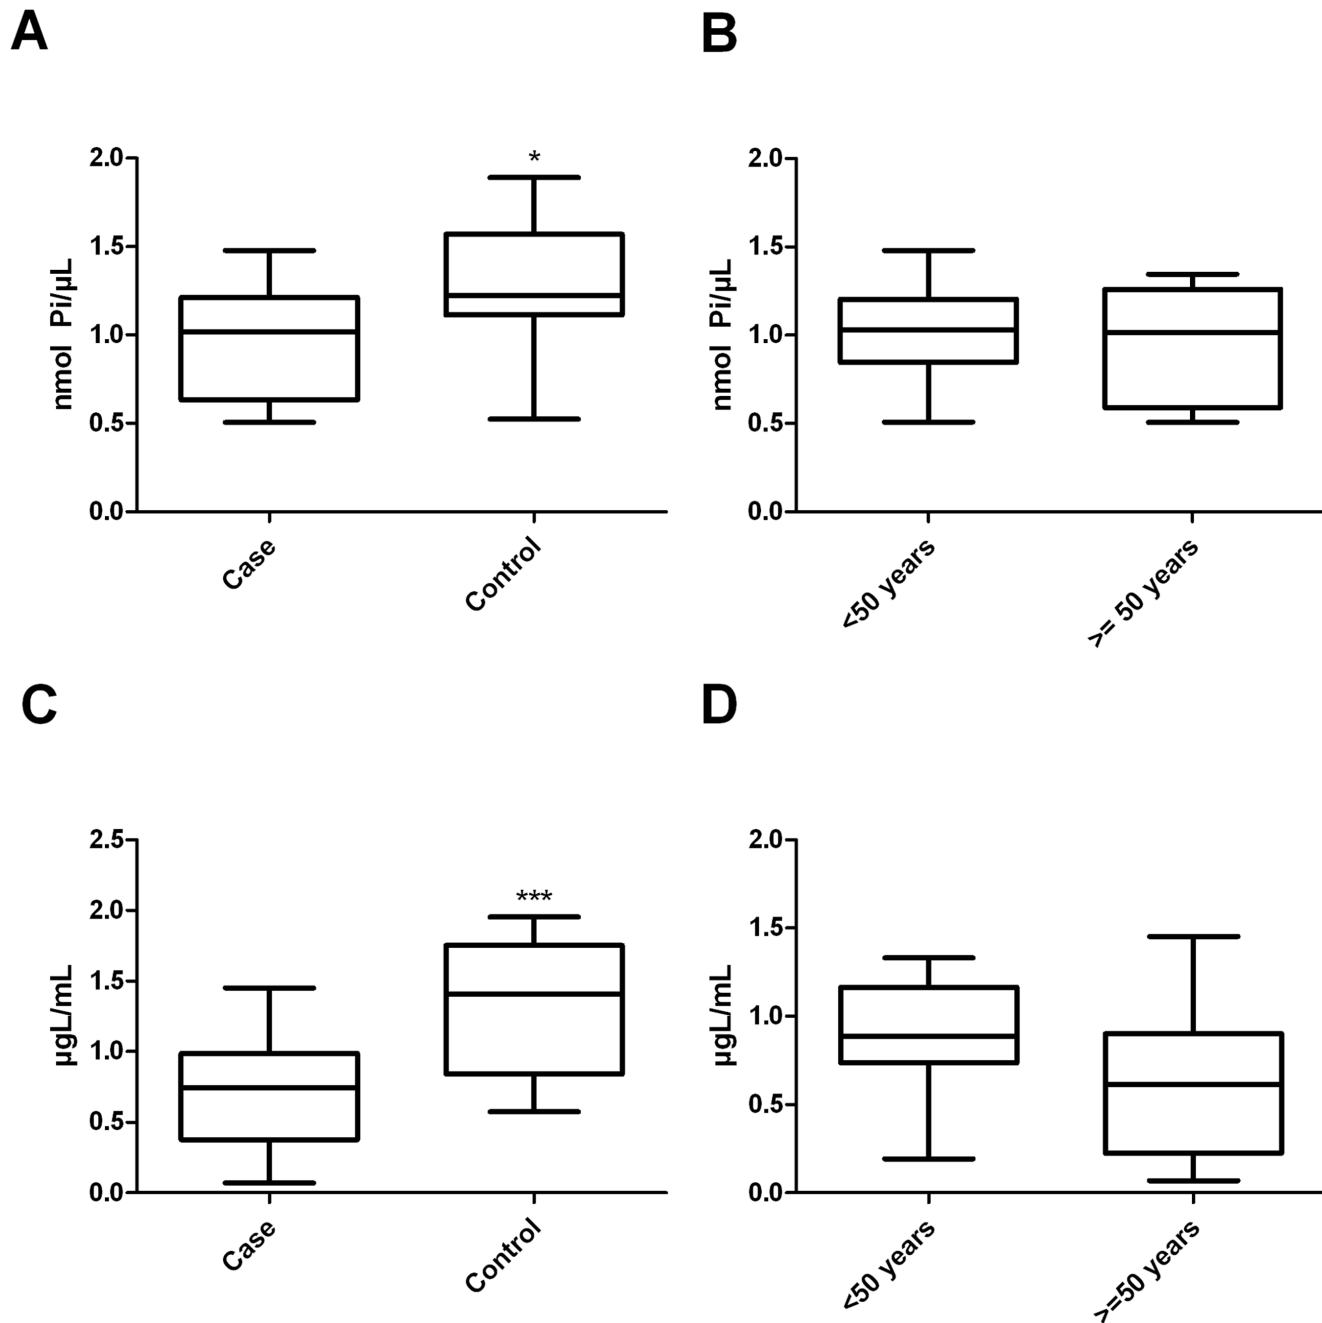

**Fig 2. Influence of iron overload on lipid profile of the erythrocyte plasma membrane.** (A) Total phospholipids:  $n = 23$  (case) and  $n = 14$  (control),  $p = 0.013$  (Student's *t* test). (B) Total phospholipids of patients with iron overload, stratified by age:  $n = 11$  (<50 years) and  $n = 12$  ( $\geq 50$  years),  $p = 0.554$  (Student's *t* test). (C) Total membrane cholesterol:  $n = 23$  (case) and  $n = 14$  (control),  $p < 0.001$  (Student's *t* test). (D) Total membrane cholesterol of patients with iron overload, stratified by age:  $n = 11$  (<50 years) and  $n = 12$  ( $\geq 50$  years),  $p = 0.241$  (Student's *t* test). All experiments were performed in triplicate and the line in bars represented the mean and the error bar denotes SEM.

doi:10.1371/journal.pone.0132852.g002

When the case group was separated according to age (Fig 2B), no significant difference was detected ( $p = 0.554$ ) between patients over and under 50 years of age. However, when the case and control groups were both stratified by age group and compared, only the case and control groups aged over 50 years showed a significant difference in lipid profile ( $p < 0.005$ ).

Patients suffering from iron overload presented a lower total membrane cholesterol content compared with that of the control group ( $p < 0.001$ ; case  $0.729 \mu\text{g/mL} \pm 0.083$  vs control  $1,331 \mu\text{g/mL} \pm 0.125$ ; Fig 2C). No significant difference was observed between patients when stratified by age ( $p = 0.241$ ), as shown in Fig 2D. Comparative analysis between case and control groups that were stratified by age showed that the total cholesterol content was lower in the case groups relative to the control groups, with  $p = 0.049$  for case and control groups containing individuals under 50 years of age and  $p = 0.002$  for those aged over 50 years (data not shown).

### 3.4. Influence of iron overload on Na,K-ATPase activity

The lipid content of erythrocyte plasma membranes was significantly different between patients with iron overload and healthy volunteers. Therefore, we next assessed whether the activity of Na,K-ATPase also differed between the groups. Na,K-ATPase activity was significantly higher (by approximately 327%) in the erythrocyte membranes from the case group than in the control group ( $p < 0.0001$ ). Averages of 3.857 and 1.178 nmol Pi/min/mg were observed for the case and control groups, respectively (Fig 3A). When the groups were divided according to age, we also found an increase in Na,K-ATPase activity for patients with iron overload, as observed in Fig 3B.

### 3.5 Red blood cells treated with H<sub>2</sub>O<sub>2</sub> and FeCl<sub>3</sub>

To further examine the mechanism responsible for the changes in Na,K-ATPase and lipid modulation, we treated the red blood cells with 0.8 mM H<sub>2</sub>O<sub>2</sub> and with 1  $\mu\text{M}$  FeCl<sub>3</sub>. After treatment for 24 h, a total lipid extract and a membrane fraction were prepared. The treatment with 0.8 mM H<sub>2</sub>O<sub>2</sub> did not cause any modification of the TBARS, the Na,K-ATPase activity or the lipid levels (Fig 4). However, 1  $\mu\text{M}$  FeCl<sub>3</sub> treatment induced similar modifications to those found in patients with iron overload; the Na,K-ATPase activity increased (Fig 4B), and the total cholesterol and phospholipids decreased (Fig 4C and 4D), though no difference in the TBARS level was observed (Fig 4A).

## Discussion

The Na,K-ATPase activity in erythrocytes presented a significant increase of approximately 327% in patients with iron overload compared to activity levels observed in the control group ( $p < 0.0001$ ). When analyzing this activity according to age, no significant difference was observed, even after a correlation of variables was implemented ( $p > 0.05$ ). However, when comparing the groups stratified by age, the activity of case patients remained high, at approximately 320%, in both age groups ( $p < 0.01$ ). The increase in the Na,K-ATPase activity may be related to several mechanisms, such as the modification of the microenvironment in which the enzyme is inserted, the action of transferrin, ROS activity, or the accumulation of intracellular Na<sup>+</sup> [8–9, 29, 38–39].

One of the first biochemical parameters that appear changed in patients with iron overload is transferrin saturation. Transferrin saturation reaches high values in these patients, generally above 80% [7]. Previous studies have demonstrated that transferrin is required for the activation of Na,K-ATPase at low concentrations of K<sup>+</sup> and that this effect is mediated by enhanced activity and iron transport by ROS. In contrast, low K<sup>+</sup> in the presence of transferrin caused an increased absorption of iron by MDCK cells. In this context, the increased activity of Na,K-ATPase appears to be a consequence of the intracellular accumulation of iron [29].

ROS are one of the products of oxidative reactions that participate in lipid peroxidation. ROS can also influence the stimulation of Na,K-ATPase. Zhou et al. demonstrated that low



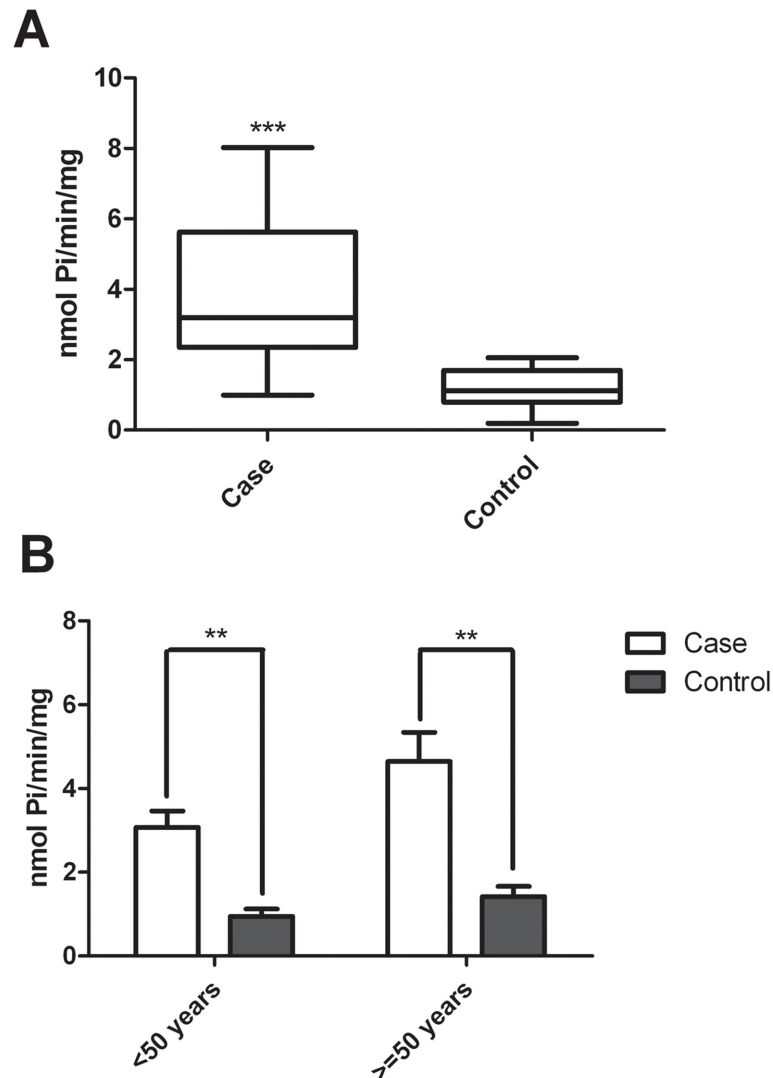

**Fig 3. Influence of Fe<sup>3+</sup> on the activity of Na,K-ATPase.** (A) Activity of Na,K-ATPase in erythrocyte membranes of individuals with or without iron overload: n = 24 (case) and n = 12 (control), p < 0.0001 (Mann Whitney). (B) Activity of Na,K-ATPase in erythrocyte membranes of subjects with or without iron overload, stratified by age group: n = 12 (<50 years), n = 06 (control <50 years), n = 12 (>= 50 years), n = 06 (Control >= 50 years). p = 0.002 (case x control <50 years), p = 0.005 (case x control >= 50 years), Student's t test. All experiments were performed in triplicates and the line in bars represented the mean and the error bar denotes SEM.

doi:10.1371/journal.pone.0132852.g003

concentrations of K<sup>+</sup> stimulate the intracellular activities of ROS and Na,K-ATPase activity in MDCK cells. The increase in Na,K-ATPase activity is mediated by ROS, which induces the gene expression of Na,K-ATPase, thereby increasing the number of enzymes and consequently its function [38].

Lipid peroxidation directly alters membrane fluidity, which is an important feature for maintaining the optimal functioning of erythrocytes. Membrane fluidity impacts the homeostatic control of erythrocytes, which in turn affects the passage of oxygen, water and ions, such as Na<sup>+</sup>, K<sup>+</sup> and Ca<sup>2+</sup>, through the membrane, thus allowing equilibrium between the

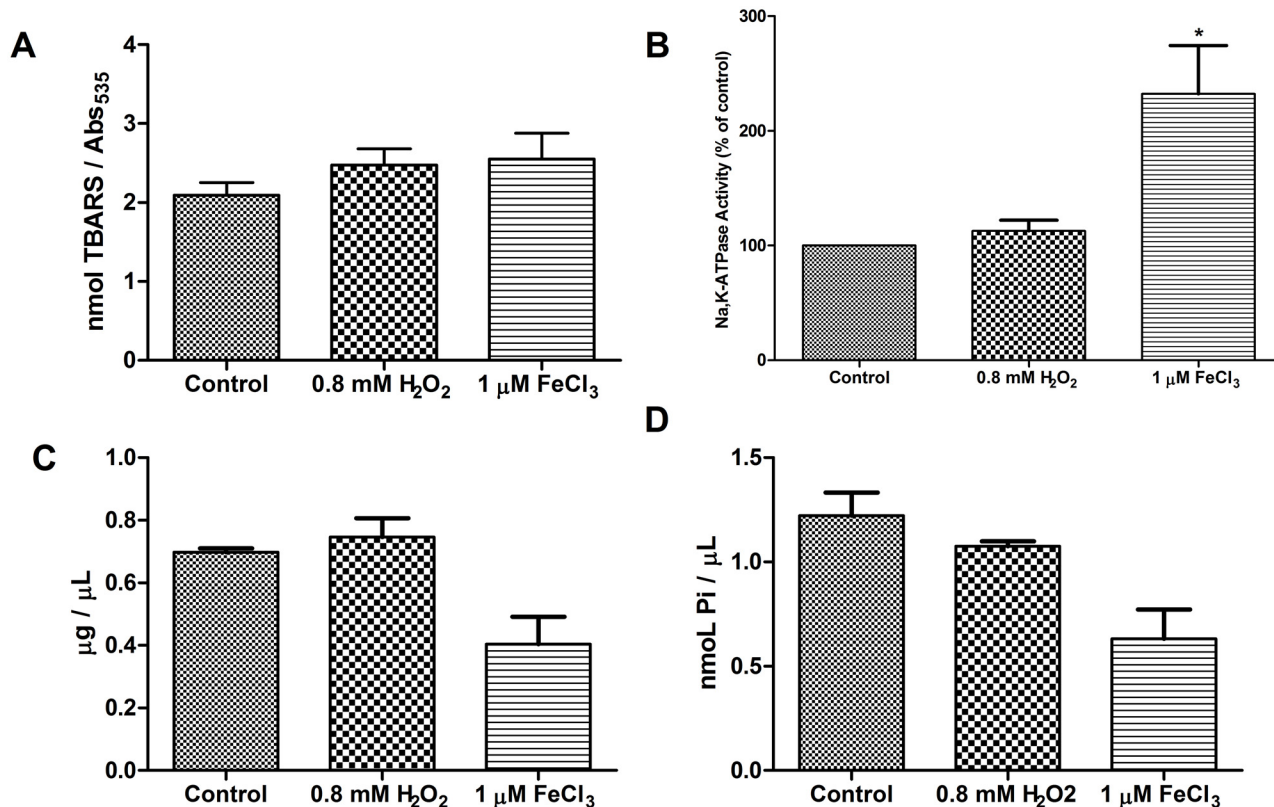

**Fig 4. H<sub>2</sub>O<sub>2</sub> and iron effect on red blood cell.** Red blood cell from health donors were incubated with 0.8 mM H<sub>2</sub>O<sub>2</sub> or 1 µM FeCl<sub>3</sub> for 24h at 4°C. This sample was used to obtain: (A) plasma TBARS levels, (B) the Na,K-ATPase activity of membrane preparation and the total levels of (C) cholesterol and (D) phospholipids. All experiments were performed in triplicates and the line in bars represented the mean and the error bar denotes SEM, \*p < 0.05; results are significantly different from controls, as evaluated by ANOVA test.

doi:10.1371/journal.pone.0132852.g004

intracellular and extracellular media. Changes in the membrane dynamics and permeability caused by lipid peroxidation have also been reported[40–41]. Lipid peroxidation is one of the main sources of irreversible Ca<sup>2+</sup> membrane permeability, which generates a series of changes in cell properties, including reduced membrane potential, increased permeability and loss of extracellular matrix components [42]. These environmental changes affect the kinetic parameters of enzymes such as Na,K-ATPase and modulate enzyme-substrate affinities [9]. In other cells, increased lysosomal fragility can lead to the release of proteolytic enzymes. Changes in the mitochondrial membrane can lead to cell death, and the stimulation of collagen deposition in the liver tissue can cause fibrosis and cirrhosis, which are often diagnosed in patients with untreated iron overload[43–44].

For the first time, we showed that the membrane lipid profile of red blood cells differs between patients with iron overload and healthy volunteers. Both the total phospholipid (p = 0.013) and cholesterol (p < 0.001) contents were lower in the case group than in the control group. Changes in cholesterol and lipid fractions may influence ion transport, membrane fluidity and membrane permeability, thereby impairing the functional efficiency of the erythrocyte. Several modifications to the morphology of red blood cells have been demonstrated to result from iron effects[45–47]. Such effects lead to changes in the elasticity of membrane, thus hindering the passage of erythrocytes through narrow capillaries and affecting the lateral mobility of the Na,K-ATPase, both of which are critical to cell function[8, 48–50].

The Na,K-ATPase is confined to the plasma membrane of animals and is thus expected to be strongly affected by the diverse membrane content of cholesterol [51]. Indeed, every reaction step measured in the Na,K-ATPase reaction cycle was significantly affected by the concentration of cholesterol: the phosphoenzyme levels increased, the apparent ATP affinity increased, the cytoplasmic Na<sup>+</sup> activation was inhibited at high Na<sup>+</sup> concentrations, and the rate of phosphorylation and of spontaneous and K<sup>+</sup>-activated dephosphorylation increased [51–53]. Cholesterol molecules were recently shown to specifically bind to 3 different sites in the enzyme in high-resolution Na,K-ATPase crystal structures [54–55].

The internal K<sup>+</sup> in red blood cells has been demonstrated to behave as a competitive inhibitor of internal Na<sup>+</sup> binding and as an activator of maximal pump flux. Those researchers further noted that cholesterol depletion enhances each of these K<sup>+</sup> effects. In the absence of internal K<sup>+</sup>, cholesterol depletion no longer has any effect on the enzyme [53].

However, only FeCl<sub>3</sub> treatment caused similar modifications in red blood cells to those found in cells from iron overload patients. Direct treatment with 0.8 mM H<sub>2</sub>O<sub>2</sub> for 24 h failed to induce any evident modification. Red blood cells have antioxidant defenses that catabolize H<sub>2</sub>O<sub>2</sub> (such as catalase and the glutathione complex), but the hydroxyl radicals produced by the Fenton reaction due to changes in iron content cannot be directly inactivated and lead to increased cellular damage [56]. Moreover, this effect shows that iron modulation of Na,K-ATPase activity is not necessarily a result of increased expression of the pump on the cell membrane; instead, the increase may be caused by a direct interaction between iron and the enzyme pump or by the modulation of cholesterol and phospholipid content. Several papers have already demonstrated an effect of iron on Na,K-ATPase activity [57–58].

Approximately 70–76% of patients with iron overload have at least one of the recognized mutations in the HFE gene [5, 59–61]. In this study, 75% of patients in the case group had a mutant HFE genotype, although the proportion of mutant genotypes did not significantly differ between the case and control groups. In the control group, 42.8% of the participants had this mutated genotype, which suggests that the presence of the mutations in the HFE gene is not a determining factor for the occurrence of iron overload. Other factors have also been shown to induce iron overload [5, 62]. The most frequent mutant HFE genotype in case patients was H63D/WT (45.8% compared with 35.7% for the control group). However, in accordance with the literature results, patients with this genotype were not at a significantly increased risk of developing hemochromatosis and were unlikely to have symptoms of iron overload [5, 61–66]. In a recent study, H63D homozygosity was associated with an elevated mean ferritin level, but only 6.7% of the sixty patients studied had documented iron overload at follow-up [67].

Although those who are heterozygous for the C282Y mutation of the HFE gene do not usually express a hemochromatosis phenotype, 90–100% of typical hemochromatosis patients are homozygous for the C282Y mutation [68]. Here, we detected only 3 patients who were homozygous for this mutation, though the lack of correlation with iron overload may have been influenced by the small sample size.

The frequency of mutations in the HFE gene depends not only on the particular population but also on the criteria adopted for sample selection and the diagnosis of iron overload [69]. Because no studies on this subject have been previously published in Minas Gerais, a contextual evaluation of our results is not yet possible. It is likely that S65C mutations in the HFE gene were not identified in our study due to the low frequency of this mutation and the limited number of patients analyzed [70]. The frequency of the H63D mutation was higher for both the case (35.4%) and control subjects (17.9%), as expected [5, 59, 61–62, 66].

The main clinical manifestations reported by patients are consistent with those described in previous studies [63, 71–72], except for intense sweating, which was not previously reported.

The human body has no specific mechanism for iron removal; consequently, it is possible that the body eliminates iron through sweat [73]. Thus, this pattern of increased sweating of patients with iron overload appears to be an adaptation by the body to increased iron content. Stratifying both groups by age revealed that skin hyperpigmentation presents more frequently in patients under 50 years ( $p = 0.012$ ). Hyperpigmentation of the skin is likely due to iron-induced increases in the melanin or iron deposits around sudoriparous glands [74]. The differences observed between the age groups are likely the result of increased levels of iron accumulation in older patients because the iron overload likely occurs for a longer period than experienced by younger patients. Importantly, the absence of differences found between the patients and control subjects may not be a reflection of disease effects but rather may be due to the small sample sizes, as only 2 data sources were used in some strata (Table 1).

## Conclusions

In erythrocytes, iron overload can compromise functional efficiency, decrease membrane phospholipid and cholesterol content, and increase lipid peroxidation and Na,K-ATPase activity. These effects are specifically modulated by the increase in iron content and are not simply a result of the consequent increase in intracellular ROS.

## Acknowledgments

We thank the Hemominas Foundation for providing samples and archives to collect, and Dr. Gustavo Blanco and Dra. Flavia Costa for critically reading the manuscript. This work was supported by FAPEMIG (Fundação de Amparo a Pesquisa do Estado de Minas Gerais), CAPES (Coordenação de Aperfeiçoamento de Pessoal de Nível Superior) and CNPq (Conselho Nacional de Desenvolvimento Científico e Tecnológico).

## Author Contributions

Conceived and designed the experiments: LLS VFC HLS LAB. Performed the experiments: LS IJPG ESO TGFC LNDS COR. Analyzed the data: LS IJPG CQT LLS VFC HLS LAB. Contributed reagents/materials/analysis tools: CQT LLS LAB. Wrote the paper: LS CQT LLS VFC HLS LAB.

## References

1. Santos PCJL, Cançado RD, Terada CT, Guerra-Shinohara EM. Alterações moleculares associadas à hemocromatose hereditária. *Revista Brasileira de Hematologia e Hemoterapia*. 2009; 31:192–202.
2. Beutler E. Disorders of iron metabolism. In: Lichtman MA, Beutler E, Seligsohn U, Kaushansky K, Kipps TJ, Prchal JT, editors. *Williams Hematology*. 7 ed. New York: MacGraw-Hill; 2006.
3. Motta VT. *Bioquímica Clínica: Princípios e Interpretações*. 5 ed. Rio de Janeiro: Medbook; 2009.
4. Moura E, Noordermeer MA, Verhoeven N, Verheul AF, Marx JJ. Iron release from human monocytes after erythrophagocytosis in vitro: an investigation in normal subjects and hereditary hemochromatosis patients. *Blood*. 1998; 92(7):2511–9. PMID: [9746792](#).
5. Cançado RD, Chiattoni CS. Visão atual da hemocromatose hereditária. *Revista Brasileira de Hematologia e Hemoterapia*. 2010; 32:469–75.
6. Kumar V, Abbas AK, Fausto N. *Patologia: Bases Patológicas das Doenças*. 7 ed. Rio de Janeiro: Elsevier; 2005.
7. Brissot P, de Bels F. Current approaches to the management of hemochromatosis. *Hematology Am Soc Hematol Educ Program*. 2006:36–41. doi: [10.1182/asheducation-2006.1.36](#) PMID: [17124037](#).
8. de Lima Santos H, Lopes ML, Maggio B, Ciancaglini P. Na,K-ATPase reconstituted in liposomes: effects of lipid composition on hydrolytic activity and enzyme orientation. *Colloids Surf B Biointerfaces*. 2005; 41(4):239–48. doi: [10.1016/j.colsurfb.2004.12.013](#) PMID: [15748819](#).

9. Santos HeL Rigos CF, Ciancaglini P. Kinetics behaviors of Na,K-ATPase: comparison of solubilized and DPPC:DPPE-liposome reconstituted enzyme. *Comp Biochem Physiol C Toxicol Pharmacol*. 2006; 142(3–4):309–16. doi: [10.1016/j.cbpc.2005.11.003](https://doi.org/10.1016/j.cbpc.2005.11.003) PMID: [16413831](https://pubmed.ncbi.nlm.nih.gov/16413831/).
10. Gallagher PG. Disorders of red cell volume regulation. *Curr Opin Hematol*. 2013; 20(3):201–7. doi: [10.1097/Moh.0b013e32835f6870](https://doi.org/10.1097/Moh.0b013e32835f6870) WOS:000317468100003. PMID: [23519154](https://pubmed.ncbi.nlm.nih.gov/23519154/)
11. Delaunay J. The molecular basis of hereditary red cell membrane disorders. *Blood reviews*. 2007; 21(1):1–20. doi: [10.1016/j.blre.2006.03.005](https://doi.org/10.1016/j.blre.2006.03.005) PMID: [16730867](https://pubmed.ncbi.nlm.nih.gov/16730867/).
12. Sarkadi B, Parker JC. Activation of ion transport pathways by changes in cell volume. *Biochimica et biophysica acta*. 1991; 1071(4):407–27. PMID: [1721542](https://pubmed.ncbi.nlm.nih.gov/1721542/).
13. Brugnara C, Bunn HF, Tosteson DC. Ion content and transport and the regulation of volume in sickle cells. *Annals of the New York Academy of Sciences*. 1989; 565:96–103. PMID: [2672974](https://pubmed.ncbi.nlm.nih.gov/2672974/).
14. Bogdanova A, Berenbrink M, Nikinmaa M. Oxygen-dependent ion transport in erythrocytes. *Acta physiologica*. 2009; 195(3):305–19. doi: [10.1111/j.1748-1716.2008.01934.x](https://doi.org/10.1111/j.1748-1716.2008.01934.x) PMID: [18983458](https://pubmed.ncbi.nlm.nih.gov/18983458/).
15. Pretorius E, Kell DB. Diagnostic morphology: biophysical indicators for iron-driven inflammatory diseases. *Integrative biology: quantitative biosciences from nano to macro*. 2014; 6(5):486–510. doi: [10.1039/c4ib00025k](https://doi.org/10.1039/c4ib00025k) PMID: [24714688](https://pubmed.ncbi.nlm.nih.gov/24714688/).
16. Dhar-Chowdhury P, Malester B, Rajacic P, Coetzee WA. The regulation of ion channels and transporters by glycolytically derived ATP. *Cellular and molecular life sciences: CMLS*. 2007; 64(23):3069–83. doi: [10.1007/s00018-007-7332-3](https://doi.org/10.1007/s00018-007-7332-3) PMID: [17882378](https://pubmed.ncbi.nlm.nih.gov/17882378/).
17. Whittam R, Ager ME. The connexion between active cation transport and metabolism in erythrocytes. *Biochem J*. 1965; 97(1):214–27. PMID: [16749106](https://pubmed.ncbi.nlm.nih.gov/16749106/); PubMed Central PMCID: [PMC1264564](https://pubmed.ncbi.nlm.nih.gov/pmc/PMC1264564/).
18. Palmgren MG, Nissen P. P-type ATPases. *Annu Rev Biophys*. 2011; 40:243–66. doi: [10.1146/annurev.biophys.093008.131331](https://doi.org/10.1146/annurev.biophys.093008.131331) PMID: [21351879](https://pubmed.ncbi.nlm.nih.gov/21351879/).
19. Apell HJ. How do P-type ATPases transport ions? *Bioelectrochemistry*. 2004; 63(1–2):149–56. doi: [10.1016/j.bioelechem.2003.09.021](https://doi.org/10.1016/j.bioelechem.2003.09.021) PMID: [15110265](https://pubmed.ncbi.nlm.nih.gov/15110265/).
20. Kaplan JH. Biochemistry of Na,K-ATPase. *Annu Rev Biochem*. 2002; 71:511–35. doi: [10.1146/annurev.biochem.71.102201.141218](https://doi.org/10.1146/annurev.biochem.71.102201.141218) PMID: [12045105](https://pubmed.ncbi.nlm.nih.gov/12045105/).
21. Garty H, Karlish SJ. Role of FXD proteins in ion transport. *Annu Rev Physiol*. 2006; 68:431–59. doi: [10.1146/annurev.physiol.68.040104.131852](https://doi.org/10.1146/annurev.physiol.68.040104.131852) PMID: [16460279](https://pubmed.ncbi.nlm.nih.gov/16460279/).
22. Ogawa H, Toyoshima C. Homology modeling of the cation binding sites of Na<sup>+</sup>K<sup>+</sup>-ATPase. *Proc Natl Acad Sci U S A*. 2002; 99(25):15977–82. doi: [10.1073/pnas.202622299](https://doi.org/10.1073/pnas.202622299) PMID: [12461183](https://pubmed.ncbi.nlm.nih.gov/12461183/); PubMed Central PMCID: [PMC138550](https://pubmed.ncbi.nlm.nih.gov/pmc/PMC138550/).
23. Geering K. The functional role of beta subunits in oligomeric P-type ATPases. *J Bioenerg Biomembr*. 2001; 33(5):425–38. PMID: [11762918](https://pubmed.ncbi.nlm.nih.gov/11762918/).
24. Forbush B, Kaplan JH, Hoffman JF. Characterization of a new photoaffinity derivative of ouabain: labeling of the large polypeptide and of a proteolipid component of the Na, K-ATPase. *Biochemistry*. 1978; 17(17):3667–76. PMID: [210802](https://pubmed.ncbi.nlm.nih.gov/210802/).
25. Suhail M. Na, K-ATPase: Ubiquitous Multifunctional Transmembrane Protein and its Relevance to Various Pathophysiological Conditions. *J Clin Med Res*. 2010; 2(1):1–17. doi: [10.4021/jocmr2010.02.263w](https://doi.org/10.4021/jocmr2010.02.263w) PMID: [22457695](https://pubmed.ncbi.nlm.nih.gov/22457695/); PubMed Central PMCID: [PMC3299169](https://pubmed.ncbi.nlm.nih.gov/pmc/PMC3299169/).
26. Hoffman JF, Wickrema A, Potapova O, Milanick M, Yingst DR. Na pump isoforms in human erythroid progenitor cells and mature erythrocytes. *Proc Natl Acad Sci U S A*. 2002; 99(22):14572–7. doi: [10.1073/pnas.222539999](https://doi.org/10.1073/pnas.222539999) PMID: [12388775](https://pubmed.ncbi.nlm.nih.gov/12388775/); PubMed Central PMCID: [PMC137924](https://pubmed.ncbi.nlm.nih.gov/pmc/PMC137924/).
27. Else PL, Wu BJ. What role for membranes in determining the higher sodium pump molecular activity of mammals compared to ectotherms? *J Comp Physiol B*. 1999; 169(4–5):296–302. PMID: [10466220](https://pubmed.ncbi.nlm.nih.gov/10466220/).
28. Cornelius F. Modulation of Na,K-ATPase and Na-ATPase activity by phospholipids and cholesterol. I. Steady-state kinetics. *Biochemistry*. 2001; 40(30):8842–51. PMID: [11467945](https://pubmed.ncbi.nlm.nih.gov/11467945/).
29. Yin W, Jiang G, Takeyasu K, Zhou X. Stimulation of Na,K-ATPase by low potassium is dependent on transferrin. *J Membr Biol*. 2003; 193(3):177–84. doi: [10.1007/s00232-003-2016-x](https://doi.org/10.1007/s00232-003-2016-x) PMID: [12962278](https://pubmed.ncbi.nlm.nih.gov/12962278/).
30. Rega AF, Garrahan PJ, Barrabin H, Horenstein A, Rossi JP. Cation flux across biomembranes. *New York: Academic*; 1979. p. 67–76.
31. Adams PE. Determining Iron Content in Foods by Spectrophotometry. *Journal of Chemical Education*. 1995; 72(7):649. doi: [10.1021/ed072p649](https://doi.org/10.1021/ed072p649)
32. Buege JA, Aust SD. Microsomal lipid peroxidation. *Methods Enzymol*. 1978; 52:302–10. PMID: [672633](https://pubmed.ncbi.nlm.nih.gov/672633/).
33. Fiske CH, Subbarow Y. THE COLORIMETRIC DETERMINATION OF PHOSPHORUS. *Journal of Biological Chemistry*. 1925; 66(2):375–400.

34. Rose HG, Oklander M. Improved procedure for the extraction of lipids from the human erythrocytes. *J Lipid Res.* 1965; 6:428–31. PMID: [14336214](#).
35. Vokurková M, Nováková O, Dobesová Z, Kunes J, Zicha J. Relationships between membrane lipids and ion transport in red blood cells of Dahl rats. *Life Sci.* 2005; 77(13):1452–64. doi: [10.1016/j.lfs.2005.03.014](#) PMID: [15936778](#).
36. Chen PS, Toribara TY, Warner H. Microdetermination of Phosphorus. *Analytical Chemistry.* 1956; 28(11):1756–8. doi: [10.1021/ac60119a033](#)
37. Higgins ET. Self-discrepancy: a theory relating self and affect. *Psychol Rev.* 1987; 94(3):319–40. PMID: [3615707](#).
38. Zhou X, Yin W, Doi SQ, Robinson SW, Takeyasu K, Fan X. Stimulation of Na,K-ATPase by low potassium requires reactive oxygen species. *Am J Physiol Cell Physiol.* 2003; 285(2):C319–26. doi: [10.1152/ajpcell.00536.2002](#) PMID: [12686517](#).
39. Turi JL, Piantadosi CA, Stonehuerner JD, Ghio AJ. Iron accumulation in bronchial epithelial cells is dependent on concurrent sodium transport. *Biomaterials.* 2008; 21(5):571–80. doi: [10.1007/s10534-008-9143-x](#) PMID: [18483768](#); PubMed Central PMCID: PMC2705954.
40. Mendanha SA, Anjos JL, Silva AH, Alonso A. Electron paramagnetic resonance study of lipid and protein membrane components of erythrocytes oxidized with hydrogen peroxide. *Braz J Med Biol Res.* 2012; 45(6):473–81. Epub 2012/04/05. S0100-879X2012007500050 [pii]. PMID: [22473321](#); PubMed Central PMCID: PMC3854297.
41. Hollan S. Membrane fluidity of blood cells. *Haematologia (Budap).* 1996; 27(3):109–27. Epub 1996/01/01. PMID: [14653448](#).
42. Almeida AM, Bertocini CR, Borecký J, Souza-Pinto NC, Vercesi AE. Mitochondrial DNA damage associated with lipid peroxidation of the mitochondrial membrane induced by Fe<sup>2+</sup>-citrate. *An Acad Bras Cienc.* 2006; 78(3):505–14. PMID: [16936939](#).
43. Young IS, Trouton TG, Torney JJ, McMaster D, Callender ME, Trimble ER. Antioxidant status and lipid peroxidation in hereditary haemochromatosis. *Free Radic Biol Med.* 1994; 16(3):393–7. PMID: [8063202](#).
44. Britton RS, O'Neill R, Bacon BR. Hepatic mitochondrial malondialdehyde metabolism in rats with chronic iron overload. *Hepatology.* 1990; 11(1):93–7. PMID: [2295476](#).
45. Pretorius E. The adaptability of red blood cells. *Cardiovasc Diabetol.* 2013; 12. Artn 63 doi: [10.1186/1475-2840-12-63](#) ISI:000318049500001. PMID: [23578325](#)
46. Pretorius E, Bester J, Vermeulen N, Lipinski B, Gericke GS, Kell DB. Profound Morphological Changes in the Erythrocytes and Fibrin Networks of Patients with Hemochromatosis or with Hyperferritinemia, and Their Normalization by Iron Chelators and Other Agents. *Plos One.* 2014; 9(1). ARTN e85271 doi: [10.1371/journal.pone.0085271](#) ISI:000329866300062. PMID: [24416376](#)
47. Pretorius E, Vermeulen N, Bester J, du Plooy JL, Gericke GS. The effect of iron overload on red blood cell morphology. *Lancet.* 2014; 383(9918):722-. doi: [10.1016/S0140-6736\(13\)61208-8](#) ISI:000331653300033. PMID: [24486189](#)
48. Cluitmans JC, Hardeman MR, Dinkla S, Brock R, Bosman GJ. Red blood cell deformability during storage: towards functional proteomics and metabolomics in the Blood Bank. *Blood Transfus.* 2012; 10 Suppl 2:s12–8. doi: [10.2450/2012.004s](#) PMID: [22890263](#); PubMed Central PMCID: PMC3418616.
49. Esmann M, Marsh D. Lipid-protein interactions with the Na,K-ATPase. *Chem Phys Lipids.* 2006; 141(1–2):94–104. doi: [10.1016/j.chemphyslip.2006.02.018](#) PMID: [16580658](#).
50. Rodrigo R, Bächler JP, Araya J, Prat H, Passalacqua W. Relationship between (Na + K)-ATPase activity, lipid peroxidation and fatty acid profile in erythrocytes of hypertensive and normotensive subjects. *Mol Cell Biochem.* 2007; 303(1–2):73–81. doi: [10.1007/s11010-007-9457-y](#) PMID: [17410406](#).
51. Cornelius F, Habeck M, Kanai R, Toyoshima C, Karlsh SJ. General and specific lipid-protein interactions in Na,K-ATPase. *Biochimica et biophysica acta.* 2015. Epub 2015/03/21. S0005-2736(15)00091-7 [pii]doi: [10.1016/j.bbame.2015.03.012](#) PMID: [25791351](#).
52. Cornelius F. Cholesterol modulation of molecular activity of reconstituted shark Na<sup>+</sup>,K<sup>(+)</sup>-ATPase. *Biochimica et biophysica acta.* 1995; 1235(2):205–12. Epub 1995/05/04. 0005-2736(95)80006-2 [pii]. PMID: [7756327](#).
53. Claret M, Garay R, Giraud F. The effect of membrane cholesterol on the sodium pump in red blood cells. *J Physiol.* 1978; 274:247–63. Epub 1978/01/01. PMID: [624995](#); PubMed Central PMCID: PMC1282488.
54. Ogawa H, Shinoda T, Cornelius F, Toyoshima C. Crystal structure of the sodium-potassium pump (Na<sup>+</sup>,K<sup>+</sup>-ATPase) with bound potassium and ouabain. *Proc Natl Acad Sci U S A.* 2009; 106(33):13742–7.

- Epub 2009/08/12. 0907054106 [pii] doi: [10.1073/pnas.0907054106](https://doi.org/10.1073/pnas.0907054106) PMID: [19666591](https://pubmed.ncbi.nlm.nih.gov/19666591/); PubMed Central PMCID: [PMC2728964](https://pubmed.ncbi.nlm.nih.gov/PMC2728964/).
55. Morth JP, Pedersen BP, Toustrup-Jensen MS, Sorensen TL, Petersen J, Andersen JP, et al. Crystal structure of the sodium-potassium pump. *Nature*. 2007; 450(7172):1043–9. Epub 2007/12/14. [nature06419 \[pii\] doi: 10.1038/nature06419](https://doi.org/10.1038/nature06419) PMID: [18075585](https://pubmed.ncbi.nlm.nih.gov/18075585/).
  56. Haro KJ, Sheth A, Scheinberg DA. Dysregulation of IRP1-mediated iron metabolism causes gamma ray-specific radioresistance in leukemia cells. *Plos One*. 2012; 7(11):e48841. Epub 2012/11/17. doi: [10.1371/journal.pone.0048841](https://doi.org/10.1371/journal.pone.0048841) PONE-D-12-11363 [pii]. PMID: [23155415](https://pubmed.ncbi.nlm.nih.gov/23155415/); PubMed Central PMCID: [PMC3498264](https://pubmed.ncbi.nlm.nih.gov/PMC3498264/).
  57. Goldshleger R, Karlish SJ. Fe-catalyzed cleavage of the alpha subunit of Na/K-ATPase: evidence for conformation-sensitive interactions between cytoplasmic domains. *Proc Natl Acad Sci U S A*. 1997; 94(18):9596–601. PMID: [9275168](https://pubmed.ncbi.nlm.nih.gov/9275168/); PubMed Central PMCID: [PMC23229](https://pubmed.ncbi.nlm.nih.gov/PMC23229/).
  58. Goldshleger R, Karlish SJ. The energy transduction mechanism of Na,K-ATPase studied with iron-catalyzed oxidative cleavage. *J Biol Chem*. 1999; 274(23):16213–21. PMID: [10347176](https://pubmed.ncbi.nlm.nih.gov/10347176/).
  59. Santos PC, Cançado RD, Pereira AC, Schettert IT, Soares RA, Pagliusi RA, et al. Hereditary hemochromatosis: mutations in genes involved in iron homeostasis in Brazilian patients. *Blood Cells Mol Dis*. 2011; 46(4):302–7. doi: [10.1016/j.bcmd.2011.02.008](https://doi.org/10.1016/j.bcmd.2011.02.008) PMID: [21411349](https://pubmed.ncbi.nlm.nih.gov/21411349/).
  60. Cançado RD, Guglielmi AC, Vergueiro CS, Rolim EG, Figueiredo MS, Chiattoni CS. Analysis of HFE gene mutations and HLA-A alleles in Brazilian patients with iron overload. *Sao Paulo Med J*. 2006; 124(2):55–60. PMID: [16878186](https://pubmed.ncbi.nlm.nih.gov/16878186/).
  61. Santos PC, Pereira AC, Cançado RD, Schettert IT, Sobreira TJ, Oliveira PS, et al. HFE gene mutations in patients with primary iron overload: is there a significant improvement in molecular diagnosis yield with HFE sequencing? *Blood Cells Mol Dis*. 2010; 45(4):302–7. doi: [10.1016/j.bcmd.2010.08.008](https://doi.org/10.1016/j.bcmd.2010.08.008) PMID: [20843714](https://pubmed.ncbi.nlm.nih.gov/20843714/).
  62. Leão GDR, Oliveira TMM, Fernandes TMM, Freire JM, Vasconcelos RC, Farias MVMC, et al. Analysis of C282Y and H63D mutations of the HFE gene in patients with persistent hyperferritinemia. *Journal of Medicine and Medical Sciences*. 2010; 1(10):453–59.
  63. Bittencourt PL, Marin ML, Couto CA, Cançado EL, Carrilho FJ, Goldberg AC. Analysis of HFE and non-HFE gene mutations in Brazilian patients with hemochromatosis. *Clinics (Sao Paulo)*. 2009; 64(9):837–41. doi: [10.1590/s1807-59322009000900003](https://doi.org/10.1590/s1807-59322009000900003) PMID: [19759876](https://pubmed.ncbi.nlm.nih.gov/19759876/); PubMed Central PMCID: [PMCPMC2745139](https://pubmed.ncbi.nlm.nih.gov/PMC2745139/).
  64. Calado RT, Franco RF, Pazin-Filho A, Simões MV, Marin-Neto JA, Zago MA. HFE gene mutations in coronary atherosclerotic disease. *Braz J Med Biol Res*. 2000; 33(3):301–6. PMID: [10719381](https://pubmed.ncbi.nlm.nih.gov/10719381/).
  65. Bueno S, Duch CR, Figueiredo MS. Mutations in the HFE gene (C282Y, H63D, S65C) in a Brazilian population. *Revista Brasileira de Hematologia e Hemoterapia*. 2006; 28:293–5.
  66. Oliveira TM, Souza FP, Jardim AC, Cordeiro JA, Pinho JR, Sitnik R, et al. HFE gene mutations in Brazilian thalassemic patients. *Braz J Med Biol Res*. 2006; 39(12):1575–80. 17160266. PMID: [17160266](https://pubmed.ncbi.nlm.nih.gov/17160266/)
  67. Kelley M, Joshi N, Xie YG, Borgaonkar M. Iron overload is rare in patients homozygous for the H63D mutation. *Can J Gastroenterol*. 2014; 28(4):198–202. ISI:000334402400007.
  68. Adams PC. Epidemiology and diagnostic testing for hemochromatosis and iron overload. *Int J Lab Hematol*. 2015; 37 Suppl 1:25–30. Epub 2015/05/16. doi: [10.1111/ijlh.12347](https://doi.org/10.1111/ijlh.12347) PMID: [25976957](https://pubmed.ncbi.nlm.nih.gov/25976957/).
  69. Cançado RD, Guglielmi ACO, Vergueiro CSV, Rolim EG, Figueiredo MS, Chiattoni CS. Estudo das mutações C282Y, H63D e S65C do gene HFE em doentes brasileiros com sobrecarga de ferro. *Revista Brasileira de Hematologia e Hemoterapia*. 2007; 29:351–60.
  70. Oliveira VC, Caxito FA, Gomes KB, Castro AM, Pardini VC, Ferreira AC. Frequency of the S65C mutation in the hemochromatosis gene in Brazil. *Genet Mol Res*. 2009; 8(3):794–8. PMID: [19681031](https://pubmed.ncbi.nlm.nih.gov/19681031/).
  71. Pietrangelo A. Hereditary hemochromatosis: pathogenesis, diagnosis, and treatment. *Gastroenterology*. 2010; 139(2):393–408. e1–2. doi: [10.1053/j.gastro.2010.06.013](https://doi.org/10.1053/j.gastro.2010.06.013) PMID: [20542038](https://pubmed.ncbi.nlm.nih.gov/20542038/).
  72. Pietrangelo A. Hereditary hemochromatosis—a new look at an old disease. *N Engl J Med*. 2004; 350(23):2383–97. doi: [10.1056/NEJMra031573](https://doi.org/10.1056/NEJMra031573) PMID: [15175440](https://pubmed.ncbi.nlm.nih.gov/15175440/).
  73. Yen AW, Fanher TL, Bowlus CL. Revisiting hereditary hemochromatosis: current concepts and progress. *Am J Med*. 2006; 119(5):391–9. doi: [10.1016/j.amjmed.2005.10.041](https://doi.org/10.1016/j.amjmed.2005.10.041) PMID: [16651049](https://pubmed.ncbi.nlm.nih.gov/16651049/).
  74. Adams PC, Deugnier Y, Moirand R, Brissot P. The relationship between iron overload, clinical symptoms, and age in 410 patients with genetic hemochromatosis. *Hepatology*. 1997; 25(1):162–6. doi: [10.1002/hep.510250130](https://doi.org/10.1002/hep.510250130) PMID: [8985284](https://pubmed.ncbi.nlm.nih.gov/8985284/).
